# Supplementary material for: Mesenchymal stem cell interaction with Ti6Al4V alloy pre-exposed to simulated body fluid
Source: Royal Society of Chemistry journal article supplement (doi:10.1039/c9ra08912h), 2020-01-01
Supplement: c9ra08912h1.pdf [file c9ra08912h1.pdf]

### Supplementary data

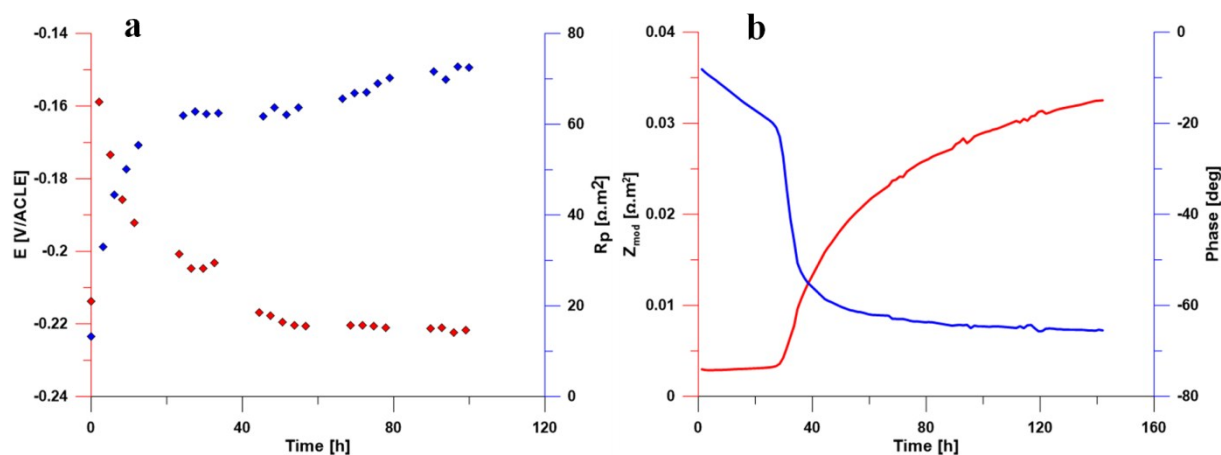

Figure S1. Time dependency of open circuit potential and polarization resistance (a) and electrochemical impedance spectroscopy at frequency 2 kHz for the specimen with ground surface (b).

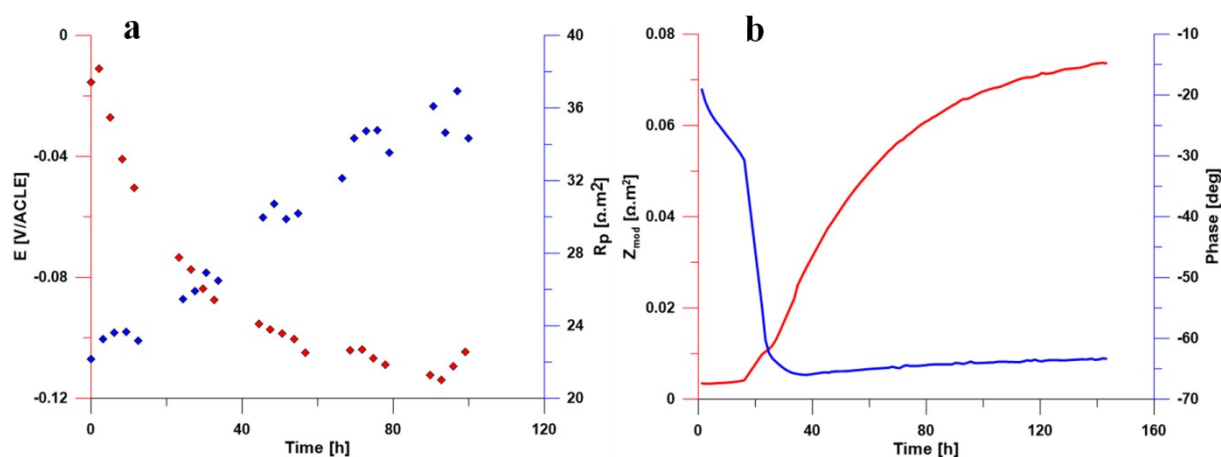

Figure S2. Time dependency of open circuit potential and polarization resistance (a) and electrochemical impedance spectroscopy at frequency 2 kHz for the specimen with nanostructured surface (b).

Table S1. List of analysed genes with their codes and catalogue numbers.

| Gene name     | Code          | Catalogue Nr. |
|---------------|---------------|---------------|
| <i>EEF-1</i>  | Hs00265885_g1 | 4331182       |
| <i>COL1A2</i> | Hs01028969_m1 | 4331182       |
| <i>IBSP</i>   | Hs00913377_m1 | 4331182       |
| <i>OCN</i>    | Hs01587814_g1 | 4331182       |
| <i>RUNX2</i>  | Hs00231692_m1 | 4331182       |

\*COL1A2-collagen type I alpha 2 chain, EEF-1- eukaryotic translation elongation factor 1 alpha 1, IBSP- integrin binding sialoprotein, OCN-osteocalcin, RUNX2-runt related transcription factor 2
